# Supplementary material
Source: Springer Nature journal article supplement (https://www.springermedizin.de/resource/supplementary/12950_2010_186_MOESM8_ESM.pdf/9558252)

Anti-CD11b (liver)

Anti-CD11c (liver)

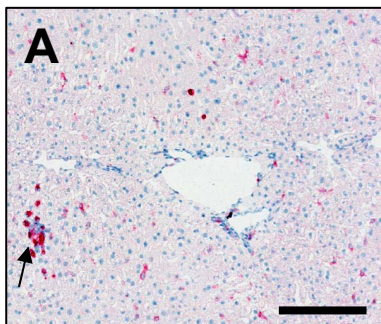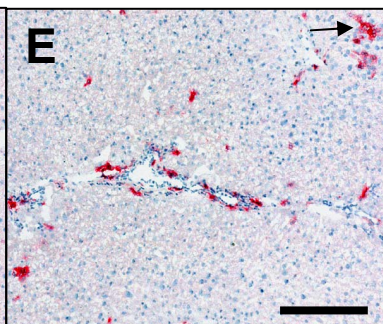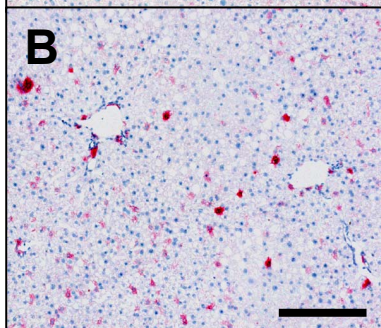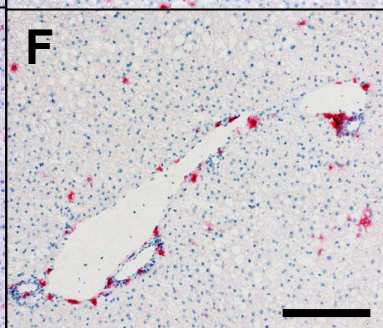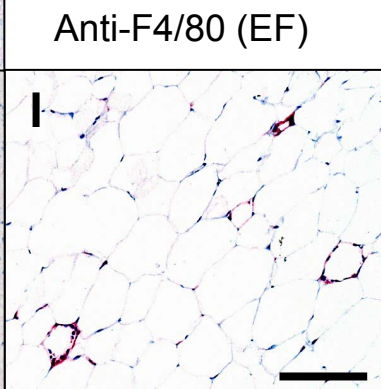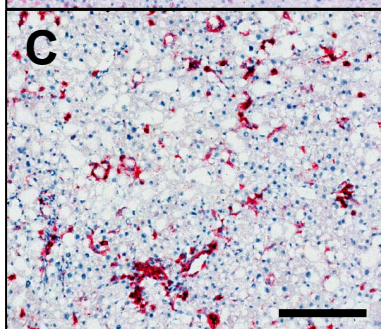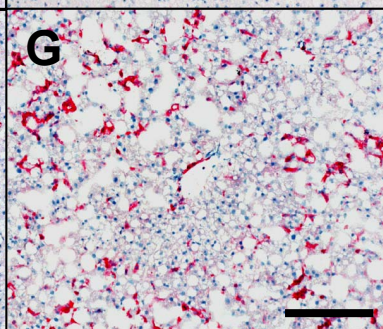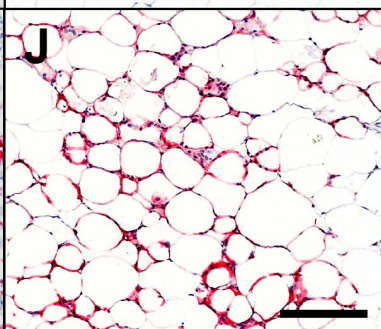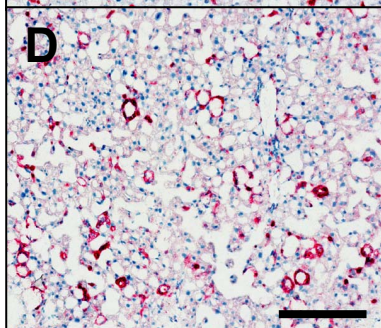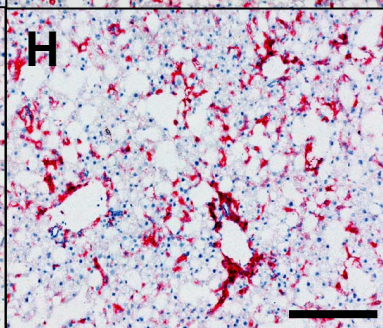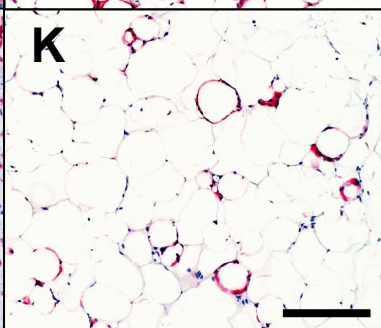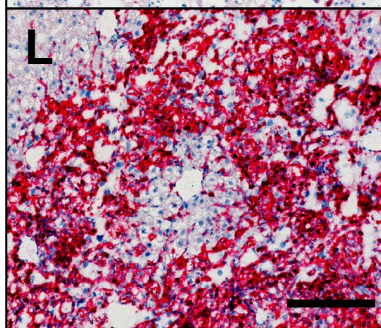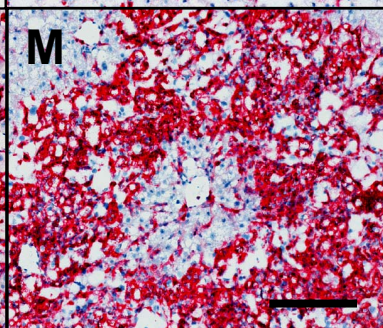

Supplement: MOESM8 [file 9558252]
